# Supplementary material
Source: publisher figshare collection journal article supplement (https://geolsoc.figshare.com/ndownloader/files/13612235)
Supplement: Supplementary file 1 [file 13612235]

## Sheet: Sheet1
Table S2. Major oxide concentration in spinel from peridotite core samples in the Luobusa ophiolite
Sample	Lithology	SiO2	TiO2	Al2O3	FeOT	MnO	MgO	CaO	NiO	Cr2O3	ZnO	Total	Mg#	Cr#
The LBS-1 borehole
B98	Hz	0.036	0.054	39.746	16.84	0.161	15.369	-	0.15	26.843	0.194	99.391	61.9316	31.188
B106	Hz	0.025	0.068	35.56	18.491	0.183	14.297	-	0.135	30.312	0.198	99.269	57.9523	36.391
B143	Hz	0.028	0.043	41.108	14.808	0.145	15.994	-	0.154	26.836	0.16	99.276	65.8158	30.463
B153	Hz	0.034	0.039	44.397	15.309	0.137	16.686	-	0.169	22.521	0.195	99.487	66.0198	25.397
B169	Hz	0.011	0.066	42.565	14.981	0.139	16.453	-	0.202	24.967	0.174	99.558	66.19	28.252
B180	Hz	0.0275	0.044	48.6463	15.0975	0.191625	17.2671	0.001375	0.260125	18.5686	0.176	100.297	67.0945	20.4019
B186	Hz	0.0098	0.0674	35.7976	16.923	0.1648	13.8392	0.005	0.1428	31.0326	0.2148	98.197	59.3121	36.7802
B199	Hz	0.0212	0.0594	42.2384	15.2412	0.1462	16.1714	0.006	0.2002	24.8546	0.186	99.2826	65.4141	28.3096
B245	Hz	0.01	0.044	41.601	14.887	0.16	15.889	-	0.178	26.342	0.184	99.293	65.5474	29.822
B256	Du	0.029	0.069	11.018	23.335	0.345	7.803	-	0.038	56.109	0.151	98.918	37.3461	77.362
B281	Hz	0.0136	0.0398	46.2714	14.8548	0.123	16.7512	0.0052	0.2536	20.6658	0.1654	99.1438	66.7788	23.0612
B300	Du	0.021	0.106	14.343	21.596	0.277	10.711	-	0.074	52.336	0.185	99.649	46.9242	71.004
B329	Hz	0.0064	0.13	35.6382	16.8686	0.1892	14.5382	0.0064	0.1674	31.2936	0.2566	99.0956	60.5724	37.078
B520	Du	0.0164	0.2754	9.611	33.0292	0.4052	6.2864	0.0112	0.0296	48.2104	0.2	98.0746	25.3326	77.0969
The LBS-2 borehole
B120	Hz	0.023	0.0218	45.8528	14.6404	0.1306	16.653	0.0134	0.1916	21.6586	0.2488	99.4334	66.9706	24.075
B137	Hz	0.0375714	0.0618571	44.0336	17.255	0.200143	16.1194	0.00414286	0.243714	21.8746	0.128429	99.9734	62.5112	25.0334
B155	Du	0.0146	0.0842	23.572	21.5398	0.2372	10.5782	0.0086	0.0734	42.7174	0.243	99.0684	46.6785	54.8736
B196	Hz	0.0202	0.0482	48.019	14.5688	0.1186	16.76	0.0036	4.0746	19.197	0.2148	99.197	67.2202	21.1481
B226	Hz	0.0172	0.049	48.043	14.1232	0.133	17.3148	0.0096	0.2224	19.4068	0.267	99.5866	68.85	21.3338
B269	Du	0.0164	0.0962	15.884	22.1374	0.3184	9.5986	0.0172	0.036	50.4884	0.1684	98.7608	43.5953	68.0841
B368	Hz	0.0126	0.0296	47.5922	14.5468	0.1168	17.034	0.01	0.229	19.3552	0.247	99.173	67.6096	21.4448
B512	Du	0.0152	0.3322	10.1812	26.0802	0.3442	8.2832	0.004	0.0926	54.156	0.1664	99.6548	36.1491	78.1162
B536	Du	0.0508	0.2068	14.4684	25.6878	0.2736	9.7998	0.0102	0.0942	48.0748	0.1514	98.8176	40.4776	69.0366
Abbreviations: Hz: harzburgite; Dun: dunite; FeOT: total Fe in FeO.
